# Dual RNA-Seq meta-analysis in *Plasmodium* infection

Parnika Mukherjee<sup>1</sup> and Emanuel Heitlinger<sup>1,2</sup>

<sup>1</sup>Department of Molecular Parasitology, Humboldt University Berlin, Philippstr 13, Haus 14, 10115 Berlin, Germany

<sup>2</sup>Leibniz-Institut für Zoo- und Wildtierforschung (IZW), Alfred-Kowalke-Straße 17, 10315 Berlin, Germany

March 13, 2019

## Abstract

Dual RNA-Seq is the simultaneous analysis of host and parasite transcriptomes. This approach can identify host-parasite interactions by correlated gene expression. Co-expression might highlight interlinked signaling, metabolic or gene regulatory pathways in addition to potentially physically interacting proteins. Numerous studies have used gene expression data to investigate *Plasmodium* infection causing malaria. Usually such studies focus on one organism – either the host or the parasite – and the other is considered “contaminant”. Dual RNA-Seq, in contrast, follows the rationale that cross-species interactions determine not only virulence of the parasite but also tolerance, resistance or susceptibility of the host.

Here we propose a meta-analysis approach for dual RNA-Seq. We screened malaria transcriptome experiments for studies providing gene expression data from both *Plasmodium* and its host. Out of 105 malaria studies in *Homo sapiens*, *Macaca mulatta* and *Mus musculus*, we identified 56 studies with the potential to provide host and parasite data. While 15 studies (1935 total samples) of these 56 explicitly aimed to generate dual RNA-Seq data, 41 (1129 samples) had an original focus on either the host or the parasite. We show that a total of up to 2530 samples are suitable for dual RNA-Seq analysis providing an unexplored potential for meta analysis.

19           We argue that the multitude of variations in experimental conditions found in the  
20 selected studies should help narrow down a conserved core of cross-species interactions.  
21 Different hosts used as laboratory models for human malaria infection are infected by  
22 evolutionarily diverse species of genus *Plasmodium*. We propose that a conserved core of  
23 interacting pathways and co-regulated genes might be identified using overlying interaction  
24 networks of different host-parasite species pairs based on orthologous genes. Our approach  
25 might also provide the opportunity to gauge the applicability of model systems for different  
26 pathways in malaria studies.

## Introduction

Transcriptomes are often analysed in a first attempt to understand cellular and organismic events, because a comprehensive profile of RNA expression can be obtained at reasonable cost and with high technical accuracy [1]. Microarrays dominated transcriptomics for over ten years since 1995 [2–4]. Microarrays quantify gene expression based on hybridisation of a target sequence to an immobilised probe of known sequence. Technical difficulties associated with microarrays lie in probe selection, cross-hybridization, and design cost of custom chips [5]. RNA sequencing (RNA-Seq) eliminates these difficulties and provides deep and accurate expression estimates for all RNAs in a sample. RNA-Seq has thus replaced microarrays as the predominant tool for transcriptomics [1,6]. RNA-Seq assesses host and parasite transcriptomes simultaneously, if RNA of both organisms is contained in a sample. Virulence of infectious disease is often a result of interlinked processes of both host and pathogen (“host-pathogen interactions”) and it has been proposed to analyse transcriptomes of both organisms involved in an infection to obtain a more complete understanding of disease [5–7]. This approach is called dual RNA-Seq.

In case of malaria, unlike in bacterial infections, both the pathogen and the host are eukaryotic organisms with similar transcriptomes. Host and parasite mRNA is selected simultaneously when poly-dT priming is used to amplify polyadenylated transcripts [5,6]. This makes most malaria transcriptome datasets potentially suitable for dual RNA-Seq analysis. Malaria research, especially transcriptomics, is traditionally designed to target one organism, either the host or the parasite. Expression of mRNA, for example, can be compared between different time points in the life cycle of *Plasmodium* or between different drug treatment conditions. In the mammalian intermediate host, *Plasmodium* invades first liver and then red blood cells (RBCs) for development and asexual expansion. While the nuclear machinery of cells from both host and parasite produces mRNA in the liver, RBCs are enucleated and transcriptionally inactive in mammalian host. In blood infections leukocytes are thus the source of host mRNA. Researchers conducting a targeted experiment might regard transcripts from the non-target organism as “contamination”. Nevertheless, expression of those transcripts potentially responds to stimuli during the investigation. Additionally, some recent studies on malaria make intentional use dual RNA-Seq. Malaria is the most thoroughly investigated disease caused by an eukaryotic organism and accumulation of these two kinds of studies, RNA-Seq with “contaminants”

59 and intentional dual RNA-Seq, provides a rich resource for meta-analysis.

60 Such a meta analysis can use co-regulated gene expression to infer host-parasite inter-  
61 actions. Correlation of mRNA expression can be indicative of different kinds of biological  
62 “interactions”: On one hand, protein products could be directly involved in the forma-  
63 tion of complexes and might therefore be produced at quantities varying similarly under  
64 altered conditions. On the other, involvement in the same biological pathways can re-  
65 sult in co-regulated gene expression without physical interaction. This broad concept of  
66 interaction has long been exploited in single organisms (e.g. [?, 8–10]). We (and others  
67 before [11]) propose to extrapolate this to interactions between the host and pathogen. It  
68 can be expected that a stimulus presented by the parasite to a host causes host immune  
69 response and the parasite in turn tries to evade this response, creating a cascade of genes  
70 co-regulated at different time points or under different conditions.

71 In this paper we explore first steps in a comparative meta-analysis of dual RNA-Seq  
72 transcriptomes. Existing raw read datasets collectively present an unexplored potential to  
73 answer questions that have not been investigated by individual studies. Meta-analysis in-  
74 creases the number of observations and statistical power and helps eliminate false positives  
75 and true negatives which may otherwise conceal important biological inferences [12–14].  
76 Since mice- and macaque-malaria are often used as laboratory models for human malaria,  
77 we analyse the availability and suitability of mRNA sequencing data from three evolution-  
78 arily close hosts - *Homo sapiens*, *Macaca mulatta* and *Mus musculus* - and their associated  
79 *Plasmodium* parasites. We summarize available data, challenges and approaches to obtain  
80 host-parasite interactions and discuss orthology across different host-parasite systems as  
81 a means to enrich information.

## 82 Data review and curation of potentially suitable 83 studies

84 Sequence data generated in biological experiments is submitted to one of the three mirror-  
85 ing databases of the International Nucleotide Sequence Database Collaboration (INSDC):  
86 NCBI Sequence Read Archive (SRA), EBI Sequence Read Archive (ERA) and DDBJ Se-  
87 quence Read Archive (DRA). Comprehensive query tools to access these databases via  
88 web interfaces and programmatically via scriptable languages exist (for example, SRADB,

89 ENAbrowseR). In these databases, all experiments submitted under a single accession are  
90 given a single “study accession number” and are collectively referred to as a “study” here  
91 onwards.

92 We used SRADB [15], a Bioconductor/R package [16,17], to query SRA [18,19] for  
93 malaria RNA-Seq studies with the potential to provide host and *Plasmodium* reads for  
94 our meta-analysis. We first selected studies with “library\_strategy” given as “RNA-Seq”  
95 and “Plasmodium” in study title, abstract or sample attributes using the “dbGetQuery”  
96 function. Then we used the “getSRA” function with the query “(malaria OR Plasmodium)  
97 AND RNA-Seq”. This function searches all fields. We manually curated the combined  
98 results and added studies based on a literature review using the terms described for  
99 the “getSRA” function in SRA, PubMed and Google Scholar. During this search, we  
100 disregarded 91 studies, all of which provide data from vectors and non-target hosts (e.g.  
101 avian malaria). 49 more studies were excluded because their gene expression data was  
102 derived from *Plasmodium* spp cultures in erythrocytes, blood or RPMI and thus can be  
103 expected to be devoid of host mRNA. We then used the SRADB Bioconductor/R package,  
104 and the prefetch and fastq-dump functions from SRAtoolkit, to download all replicate  
105 samples (called “runs” in the databases) of the selected studies. The curation of studies  
106 and the download was performed on 21 January, 2019.

107 In total we found 56 potentially suitable studies in this database and literature review.  
108 The host organism for 22 studies was *Homo sapiens*, for 24, *Mus musculus* and for 10,  
109 *Macaca mulatta*. The corresponding infecting parasites were *P. falciparum*, *P. vivax* and  
110 *P. berghei* in human studies (including four artificial infections of human liver cell culture  
111 with *P. berghei*), *P. yoelii*, *P. chabaudi* and *P. berghei* in mouse studies and *P. cynomolgi*  
112 and *P. coatneyi* in macaque studies(table 1).

113 We note that 20 of the 56 studies depleted (or enriched, respectively) specific classes of  
114 cells from their samples. Some studies, for example, targeted the parasite using vaccines  
115 derived from sporozoites during liver infection [20–22]. Such infection is physiologically  
116 asymptomatic and a low number of parasites cells [23] makes it difficult to study *Plas-*  
117 *modium* transcriptomes in this stage. To reduce overwhelming host RNA levels, 3 out of  
118 10 liver studies sorted infected hepatoma cells from uninfected cells. Similarly, 17 other  
119 studies have depleted or enriched host WBCs (leukocytes) to focus expression analysis on  
120 *Plasmodium* or the host immune system, respectively. In all these scenarios, we suspect  
121 depletion to be imperfect and thus the samples to potentially include mRNA of both or-

122 organisms. We note, however, that host gene-expression for WBC-depleted samples might  
123 be problematic as incomplete depletion might affect different types of WBCs differentially  
124 and hence bias the detectable host mRNA expression in the direction of less-depleted cell  
125 types. For the similar reasons, parasite depletion might be challenging to control for.

126 For 15 out of the 56 studies the authors state that they intended to simultaneously  
127 study host and parasite transcriptomes (“dual RNA-Seq”). This includes 8 studies from  
128 MaHPIC (Malaria Host-Pathogen Interaction Center), based at Emory University, that  
129 made extensive omics measurements in macaque malaria. The original focus of the re-  
130 maining 41 studies was on the parasite in 20 and on the host in 21 cases.

131 *Plasmodium* parasites sequester in bone marrow, adipose tissue, lung, spleen and brain  
132 (the latter causing cerebral malaria) [24, 25]. To study a comprehensive spectrum of  
133 host-parasite interactions it would be optimal to have data from these different tissues.  
134 Our collection of studies represent data derived from blood and liver for all three host  
135 organisms. In addition, we have seven spleen studies ([26–32]) and two studies of cerebral  
136 malaria ([33, 34]) from mice. MaHPIC offers a collection of blood and bone marrow studies  
137 in macaques.

138 Experiments performed on mouse blood focus on the parasite instead of the host (11  
139 vs. 0). Studies on human blood infection focus more often on the host immune response  
140 than on the parasite (9 vs. 5). Liver and spleen studies focus on host and parasite almost  
141 equally as often, with sources for host tissue in this case being either mice (*in vivo*) or  
142 hepatoma cell cultures (*in vitro*). We, here, argue that small clusters of genes co-expressed  
143 across several of such diverse conditions might help to point towards potentially novel core  
144 host-parasite interactions.

## 145 Dual RNA-Seq suitability analysis

146 A sample (experimental replicate or “run” in the jargon of sequencing databases) suitable  
147 for dual RNA-Seq analysis must provide “sufficient” gene expression from both host and  
148 parasite. To assess the proportion for host and parasite RNA sequencing reads in each  
149 study and sample we mapped sequencing reads onto concatenated host and parasite ref-  
150 erence genomes using STAR [35, 36]. Simultaneous mapping against both genomes should  
151 avoid non-specific mapping of reads in regions conserved between host and parasites. We  
152 quantified the sequencing reads mapped to exons using the “countOverlaps” function of

153 the GenomicRanges package [37] and calculated the proportion of reads mapping to host  
154 and parasite genes.

155 The proportions of host and parasite reads for each run does not always reflect the  
156 original focus of a study (fig. 1a). Studies using no depletion or enrichment give us an idea  
157 how skewed overall RNA expression is towards one organism under native conditions: in  
158 studies on blood stage infections, the original focus is mostly on immune gene expression  
159 from leukocytes. In the respective samples the number of host reads is often overwhelming  
160 unless parasitemia is very high, like in studies originally designed to use a dual RNA-Seq  
161 approach on blood stages. Samples with lower parasitemia are mostly not suitable for  
162 dual RNA-Seq analysis (table 1).

163 Many studies using depletion or enrichment prior to RNA sequencing (“enriched/depleted”  
164 in fig. 1a) show considerable expression of the non-target organism. Studies on liver infec-  
165 tion, for example, [38] and [39], comprise several runs with balanced proportions of host  
166 and parasite reads. This is a result of infected liver cells being sorted from uninfected cells  
167 in culture. While the parasite has been the original target organism in most studies they  
168 provide data suitable for dual RNA-Seq. Studies depleting whole blood from leukocytes  
169 to focus on parasite transcriptomes still show considerable host gene expression and pro-  
170 vide principally suitable runs for the analysis of blood infection at lower intensities. The  
171 latter comes with the caveat that host expression might be biased by unequal depletion  
172 of particular cell types.

173 To establish suitability thresholds for inclusion of individual samples (runs) in further  
174 analysis we plotted the number of host and parasite reads against the number of host  
175 and parasite genes expressed (fig. 1b and fig. 1c). For runs with high sequencing depth  
176 the total number of expressed genes of the host and parasite approaches the number of  
177 annotated genes: around 30000 for the mammalian host and around 4500 for *Plasmodium*.  
178 When sequencing depth is lower, the number of genes detected as expressed is lower and  
179 a decrease in sensitivity can be expected to prevent analysis of lowly expressed genes. We  
180 propose four parameters for suitability thresholds in dual RNA-Seq analysis: the number  
181 reads mapping to host (1) and (2) parasite genes and the number of genes these reads map  
182 to (expressed genes) in host and parasite (3, 4). In table 1, we give the number of runs  
183 considered suitable for three different combinations of thresholding. Without claiming a  
184 particular thresholds to be ideal we propose to use thresholds to avoid uninformative runs  
185 in further processing to reduce the computational burden of co-expression analysis.

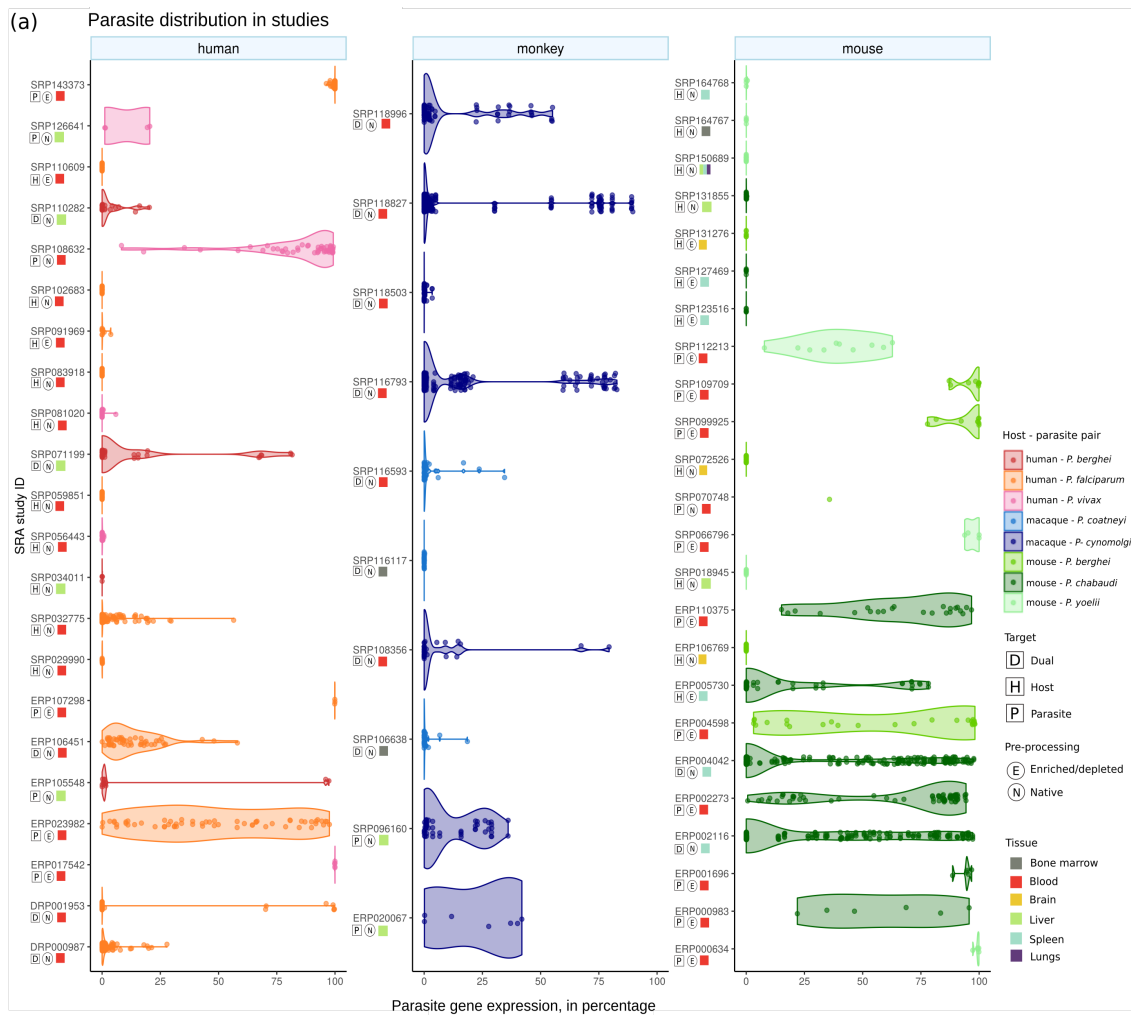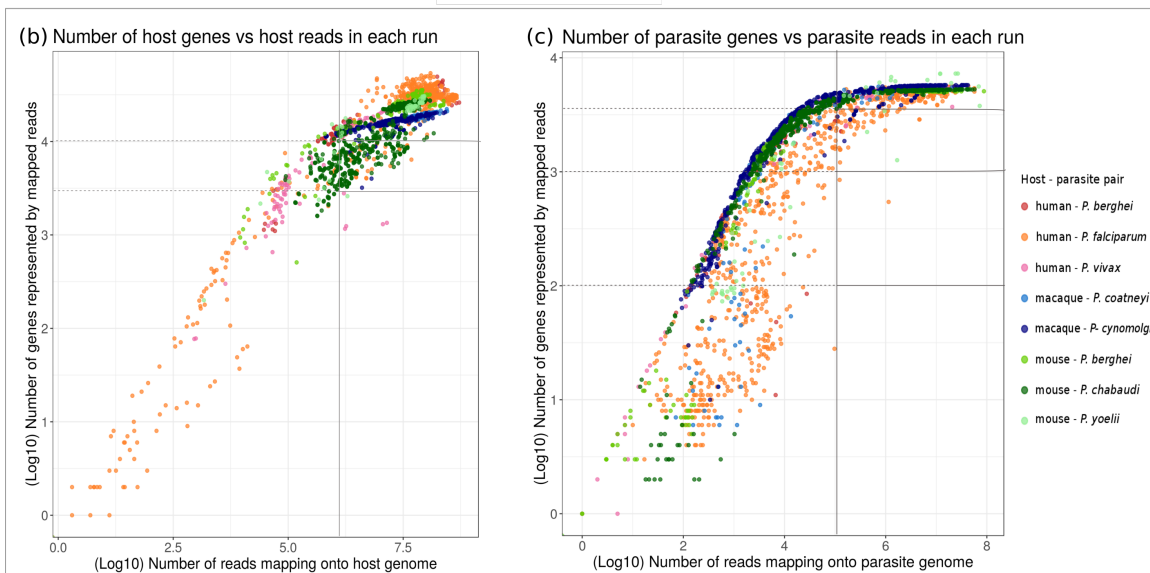

Figure 1: Proportion and number of sequencing reads and expressed genes from parasite and host in selected malaria RNA-Seq studies. We mapped sequencing reads from studies selected for their potential to provide both host and parasite gene expression data (studies N=56, total runs n=3064) mapped against appropriate host and parasite genomes. (a) The percentage of parasite reads (x-axis) is plotted for runs in each study. The studies are categorised according to the host organisms and labeled “enriched/depleted” to indicate enrichment of infected hepatocytes or depletion of leukocytes from blood. Studies labeled “dual” were originally intended to simultaneously assess host and parasite transcriptomes. We also plot the number of reads mapped against the number of expressed genes for host (a) and parasite (b). The number of expressed genes increases with sequencing depth towards the maximum of all annotated genes for the respective organism. The vertical lines indicate a threshold of 1,000,000 and 100,000 reads for host and parasite, respectively. The horizontal lines correspond to thresholds on the number of expressed genes at 10,000 and 3,000 for host and at 1,000 and 100 for the parasite. At such exemplary thresholds data could be considered sufficient for dual RNA-Seq analysis on both organisms.



Table 1: Number of studies for each host-parasite pair and suitability analysis of their runs.

| Host    | Parasite             | # total studies | # total runs | # depletion studies | # depletion runs | Run suitability analysis from all studies |                  |           |                            |           |        |                                                                         |           |
|---------|----------------------|-----------------|--------------|---------------------|------------------|-------------------------------------------|------------------|-----------|----------------------------|-----------|--------|-------------------------------------------------------------------------|-----------|
|         |                      |                 |              |                     |                  | # host genes                              | # parasite genes | # studies | no threshold on read count | # studies | # runs | prc <sup>a</sup> >= 10 <sup>5</sup> hrc <sup>b</sup> >= 10 <sup>6</sup> | # studies |
| Human   | <i>P. falciparum</i> | 13              | 840          | 5                   | 216              | 3000                                      | 100              | 11        | 523                        | 6         | 270    | 6                                                                       | 270       |
|         |                      |                 |              |                     |                  | 3000                                      | 1000             | 11        | 362                        | 6         | 268    | 6                                                                       | 268       |
|         |                      |                 |              |                     |                  | 10000                                     | 3000             | 7         | 219                        | 5         | 207    | 5                                                                       | 207       |
| Human   | <i>P. berghei</i>    | 4               | 77           | 4                   | 77               | 3000                                      | 100              | 3         | 60                         | 2         | 16     | 2                                                                       | 16        |
|         |                      |                 |              |                     |                  | 3000                                      | 1000             | 3         | 42                         | 2         | 16     | 2                                                                       | 16        |
|         |                      |                 |              |                     |                  | 10000                                     | 3000             | 3         | 25                         | 2         | 16     | 2                                                                       | 16        |
| Human   | <i>P. vivax</i>      | 5               | 135          | 1                   | 5                | 3000                                      | 100              | 3         | 39                         | 1         | 1      | 1                                                                       | 1         |
|         |                      |                 |              |                     |                  | 3000                                      | 1000             | 3         | 36                         | 1         | 1      | 1                                                                       | 1         |
|         |                      |                 |              |                     |                  | 10000                                     | 3000             | 2         | 4                          | 1         | 1      | 1                                                                       | 1         |
| Mouse   | <i>P. berghei</i>    | 7               | 128          | 4                   | 50               | 3000                                      | 100              | 6         | 74                         | 4         | 23     | 4                                                                       | 23        |
|         |                      |                 |              |                     |                  | 3000                                      | 1000             | 6         | 54                         | 4         | 23     | 4                                                                       | 23        |
|         |                      |                 |              |                     |                  | 10000                                     | 3000             | 4         | 24                         | 4         | 22     | 4                                                                       | 22        |
| Mouse   | <i>P. chabaudi</i>   | 10              | 926          | 7                   | 174              | 3000                                      | 100              | 8         | 869                        | 7         | 341    | 7                                                                       | 341       |
|         |                      |                 |              |                     |                  | 3000                                      | 1000             | 7         | 801                        | 7         | 341    | 7                                                                       | 341       |
|         |                      |                 |              |                     |                  | 10000                                     | 3000             | 7         | 252                        | 6         | 109    | 6                                                                       | 109       |
| Mouse   | <i>P. yoelii</i>     | 7               | 65           | 3                   | 19               | 3000                                      | 100              | 7         | 34                         | 2         | 8      | 2                                                                       | 8         |
|         |                      |                 |              |                     |                  | 3000                                      | 1000             | 6         | 21                         | 2         | 8      | 2                                                                       | 8         |
|         |                      |                 |              |                     |                  | 10000                                     | 3000             | 2         | 7                          | 2         | 6      | 2                                                                       | 6         |
| Macaque | <i>P. coatneyi</i>   | 3               | 70           | 0                   | 0                | 3000                                      | 100              | 3         | 74                         | 3         | 26     | 3                                                                       | 26        |
|         |                      |                 |              |                     |                  | 3000                                      | 1000             | 3         | 53                         | 3         | 26     | 3                                                                       | 26        |
|         |                      |                 |              |                     |                  | 10000                                     | 3000             | 3         | 33                         | 3         | 26     | 3                                                                       | 26        |
| Macaque | <i>P. cynomolgi</i>  | 7               | 849          | 0                   | 0                | 3000                                      | 100              | 7         | 857                        | 7         | 375    | 7                                                                       | 375       |
|         |                      |                 |              |                     |                  | 3000                                      | 1000             | 7         | 706                        | 7         | 357    | 7                                                                       | 357       |
|         |                      |                 |              |                     |                  | 10000                                     | 3000             | 7         | 514                        | 7         | 365    | 7                                                                       | 365       |

<sup>a</sup>prc: parasite read count

<sup>b</sup>hrc: host read count

186 Suitable runs at the thresholds chosen here are identified from human-*P. falciparum*,  
187 monkey-*P. cynomolgi*, human-*P. berghei* and mouse-*P. berghei* systems. Unfortunately,  
188 with current thresholds and currently available data, we highly under-represent human-  
189 *P. vivax* and human-*P. berghei* systems, the two liver *in vitro* models. This outcome  
190 is understandable owing to the low parasitemia in liver cultures [40]. We note that the  
191 thresholds could further be made lenient enough to include more runs for these systems  
192 at the cost of analysing only the most highly expressed parasite genes. An alternative  
193 approach relies on depleted/enriched samples for these systems. For further analysis,  
194 however, we it could prove challenging to include depleted/enriched samples as discussed  
195 before. Analysis approaches such as multilayer networks (see below) might help to gauge  
196 problems with such runs for the inference of co-expression in further steps of analysis.

## 197 Identification of co-expressed genes via correlation 198 techniques

199 Some genes are likely to show almost uniform expression under different experimental con-  
200 ditions (“housekeeping genes”). Naive assessments of correlation could, however, identify  
201 pairs of such genes as highly correlated. An analysis of co-expression can deal with this  
202 challenge in two different ways:

203 Firstly, the most variable genes within and across studies can be selected and other  
204 genes discarded. While requiring little computational time and resources, exclusion of  
205 genes with too little variance in expression from downstream analysis should be per-  
206 formed with caution, as seemingly small variations might result in a suitable signal over  
207 a large set of runs. To select only variable genes, one option is to compute their variance  
208 across all samples (in one or multiple studies). Genes with variance below a threshold  
209 may then be excluded from further analysis. As variance increases with the mean for  
210 gene expression data, the Biological Coefficient of Variation (BCV) [41,42] may provide a  
211 more robust threshold. Secondly, one can compute empirical correlation indices, similar  
212 to p-values, for any gene-pair. Empirical p-values are a robust way to estimate whether  
213 gene-pairs are correlated because of specific events (treatment condition, time point) and  
214 not by chance (e.g., housekeeping genes) [43, 44]. These methods construct a null dis-  
215 tribution using permutations of the given data instead of assuming a null distribution

216 in advance. Since host and parasite genomes total nearly 30,000 genes, the number of  
217 permutations has to be around  $1.6 \times 10^9$  to be suitable for corrections for multiple-testing.  
218 Alternatively, as computational costs for these permutations can be expected to be too  
219 high for datasets with thousands of samples, non-corrected “p-values” may be consid-  
220 ered a ranking for host-parasite gene correlation, following the suggestion of Reid and  
221 Berriman [11]. Nevertheless, reliance on empirical computation of p-values without prior  
222 variance/BCV filtering might become impracticable for very large datasets in the proposed  
223 meta- analysis.

224 We consider partial correlation as an additional approach that could be combined with  
225 the above methods. Partial correlation can control pairwise correlations for the influence  
226 of other genes [45]. In transcriptomic applications full-conditioned partial correlation is  
227 computationally very expensive. Some studies therefore resort to second-order partial  
228 correlation (relationship between two genes independent of two other genes) [46–48]. A  
229 suitable pipeline might first use (zero-order partial, that is “regular”) correlation with  
230 empirical p-values to remove constitutively expressed gene-pairs. For all correlations with  
231 an empirical “p-value” below a certain threshold, one could compute e.g. first-order partial  
232 correlations reducing the number of computations. Iterations of such an approach with  
233 higher-order partial correlations are then possible.

## 234 **Across different studies; across different host-parasite** 235 **systems**

236 *Gene × gene* matrices obtained from correlation analysis can be visualised and analysed  
237 as interaction networks. We have identified different but interlinked workflows to recon-  
238 struct a consensus network of expression correlation (fig. 2). A first approach (fig. 2(a))  
239 integrates data from different studies of one host-parasite system by simply appending  
240 expression profiles of their runs.

241 Knowledge of 1:1 orthologs [49] between different host and different parasite species  
242 can be used in the next steps to integrate across different host-parasite systems. Humans  
243 and macaques share 18179 1:1 orthologous genes, humans and mice share 17089 ortholo-  
244 gous genes and 14776 genes are 1:1:1 orthologs among all three species. Similarly, 7760  
245 groups of orthologous genes exist among the *Plasmodium* species. A simple approach

246 to combine data across host-parasite systems could again append those orthologs in the  
 247 original datasets before correlations of gene expression.

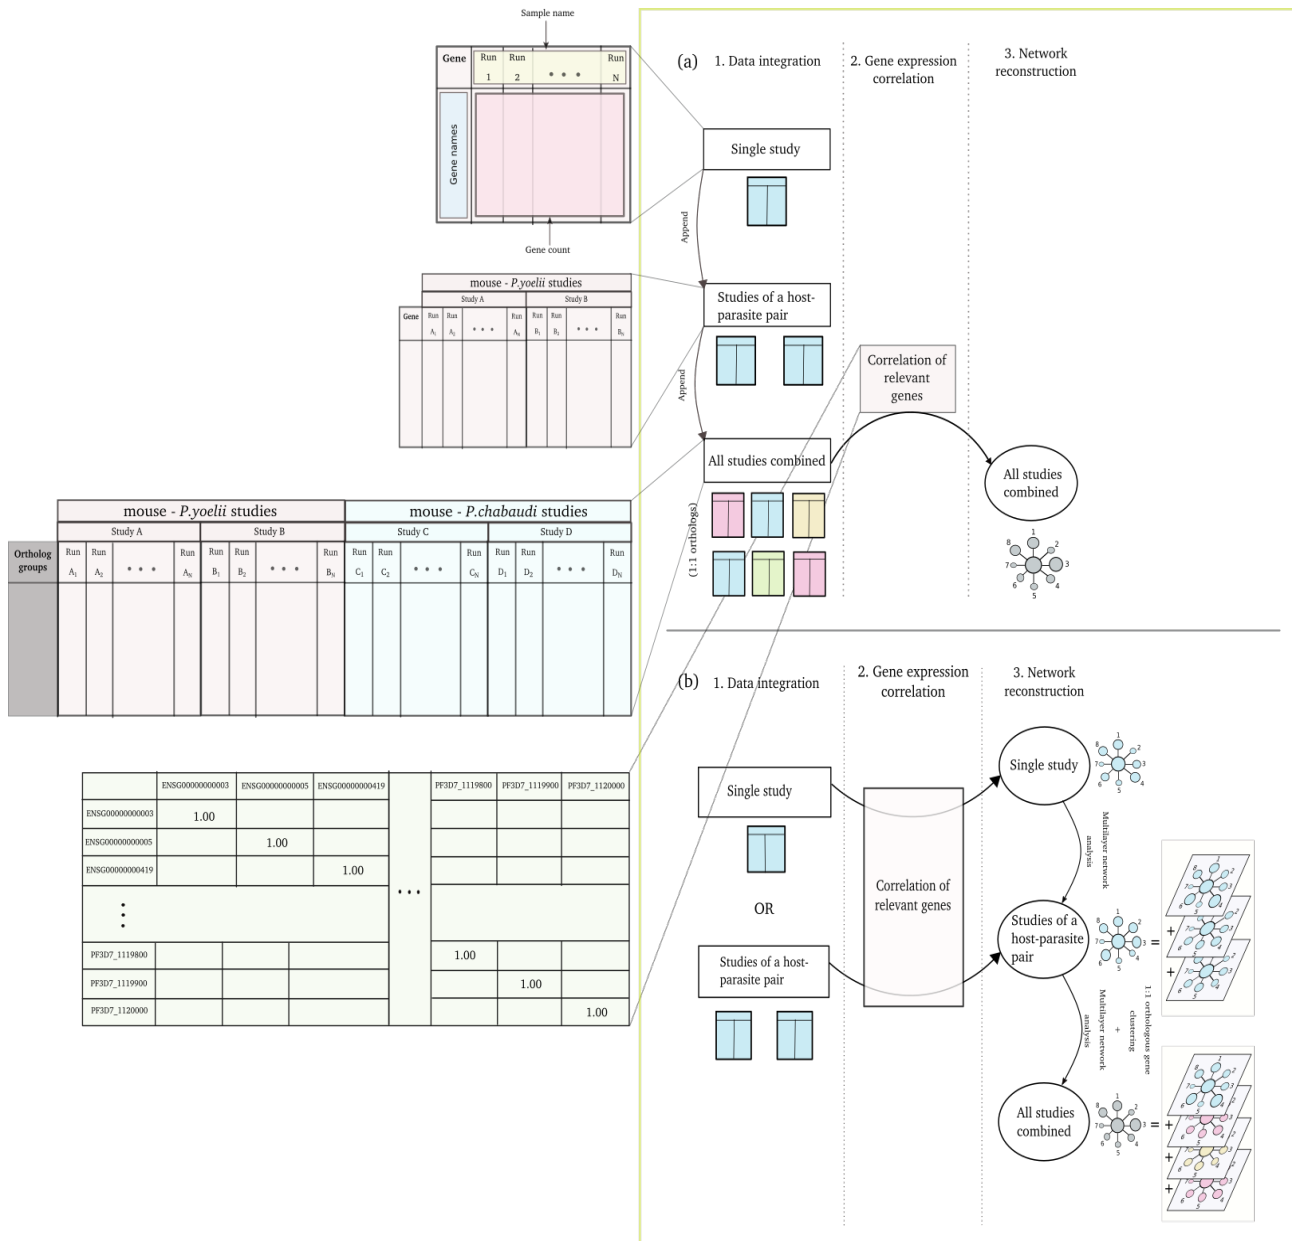

Figure 2: Two strategies identified to reconstruct host-parasite interaction networks from SRA. We identified two approaches to obtain a consensus network involving multiple hosts and multiple parasites. We selected appropriate studies from SRA for this analysis. The aim is to find a set of important interactions in malaria using co-regulated gene expression and visualising this information as a biological network. Using the first approach (figure (a)), we form single networks from single RNA-seq datasets or single networks from all studies of a host-parasite system appended one after the other, using cross-species gene correlation. To obtain a consensus network for all hosts and all parasites, we use 1:1 orthologous genes names for all hosts and all parasites, rename these genes to show their equivalency and append them to form one big dataset. Next we perform pairwise correlation of genes and finally, a network that will represent the direct interactions among orthologous genes. In (b), the second approach, we implement multi-layered network analysis to obtain a consensus network from several layers of individual networks. In this approach, we make single networks for individual RNA-seq datasets. To obtain a network for a host-parasite system, we either append all datasets of the host-parasite system with each other and form a network, or we apply multi-layered network analysis on single networks to get the consensus. To reconstruct a network involving multiple host-parasite systems, we rename orthologous genes in each layer and then look for overlapping communities.

248 Alternatively, to construct a consensus network involving all hosts and parasites, a  
 249 multi-layer network analysis could align networks by orthologous genes. This approach

250 can offer more control when looking for similar correlation in different layers representing  
251 different host-parasite systems. Similarly, more insight could be possible when correlations  
252 from different types of tissues are combined as multilayer networks. This would only  
253 require the construction of networks for a single host-parasite system and multi-layered  
254 network analysis on networks from single studies of the same host-parasite system.

255 We hope correlation between host and parasite transcript expression to highlight host-  
256 parasite interactions worth scrutiny of further focussed research. As a second goal, meta-  
257 analysis involving different host-parasite systems could give insights into how easily other  
258 insights obtained in malaria models can be translated to human malaria. If e.g. certain  
259 groups of pathways show lower evolutionary conservation in host-parasite co-expression  
260 networks, one could expect results on those to be harder to translate between systems.  
261 Finally, one can ask whether expression correlation between host and parasite species is  
262 more or less evolutionarily conserved than within host species [50–52].

## References

- 263
- 264 [1] S. Martin, C. Dehler, and E. Krol, “Transcriptomic responses in the fish intestine,”  
265 *Developmental Comparative Immunology*, vol. 64, 03 2016.
- 266 [2] M. Schena, D. Shalon, R. W. Davis, and P. O. Brown, “Quantitative monitoring of  
267 gene expression patterns with a complementary dna microarray,” *Science*, vol. 270,  
268 no. 5235, pp. 467–470, 1995.
- 269 [3] R. E. Hayward, J. L. DeRisi, S. Alfadhli, D. C. Kaslow, P. O. Brown, and P. K.  
270 Rathod, “Shotgun dna microarrays and stage-specific gene expression in plasmodium  
271 falciparum malaria,” *Molecular Microbiology*, vol. 35, no. 1, pp. 6–14, 2000.
- 272 [4] A. Craig and A. Scherf, “Transcriptional analysis in plasmodium falciparum,”  
273 *Trends in Microbiology*, vol. 8, no. 8, pp. 350 – 351, 2000.
- 274 [5] A. J. Westermann, L. Barquist, and J. Vogel, “Resolving host–pathogen interactions  
275 by dual rna-seq,” *PLOS Pathogens*, vol. 13, pp. 1–19, 02 2017.
- 276 [6] A. Westermann, S. A Gorski, and J. Vogel Prof. Dr, “Dual rna-seq of pathogen and  
277 host,” *Nature reviews. Microbiology*, vol. 10, pp. 618–30, 08 2012.
- 278 [7] H. J. Lee, A. Georgiadou, M. Walther, D. Nwakanma, L. B. Stewart, M. Levin, T. D.  
279 Otto, D. J. Conway, L. J. Coin, and A. J. Cunnington, “Integrated pathogen load  
280 and dual transcriptome analysis of systemic host-pathogen interactions in severe  
281 malaria,” *Science Translational Medicine*, vol. 10, no. 447, 2018.
- 282 [8] J. M. Stuart, E. Segal, D. Koller, and S. K. Kim, “A gene-coexpression network for  
283 global discovery of conserved genetic modules,” *Science*, vol. 302, no. 5643, pp. 249–  
284 255, 2003.
- 285 [9] H. Bono and Y. Okazaki, “Functional transcriptomes: comparative analysis of bio-  
286 logical pathways and processes in eukaryotes to infer genetic networks among tran-  
287 scripts,” *Current Opinion in Structural Biology*, vol. 12, no. 3, pp. 355 – 361, 2002.
- 288 [10] H. K. Lee, A. K. Hsu, J. Sajdak, J. Qin, and P. Pavlidis, “Coexpression analysis of  
289 human genes across many microarray data sets,” *Genome Research*, vol. 14, year =  
290 2004, doi = <https://doi.org/10.1101/gr.1910904>.
- 291 [11] A. J. Reid and M. Berriman, “Genes involved in host–parasite interactions can be  
292 revealed by their correlated expression,” *Nucleic Acids Research*, vol. 41, no. 3,  
293 pp. 1508–1518, 2013.

- 294 [12] Fayyad, P.-S. Usama, S. Gregory, and Padhraic, “From data mining to knowledge  
295 discovery in databases,” *AI Magazine*, vol. 17, 1996.
- 296 [13] A. Haidich, “Meta-analysis in medical research,” *Hippokratia*, vol. 14, Dec 2011.
- 297 [14] R. H. Fagard, J. A. Staessen, and L. Thijs, “Advantages and disadvantages of the  
298 meta-analysis approach,” *Journal of hypertension*, vol. 14, Oct 1996.
- 299 [15] Y. Zhu, R. M. Stephens, P. S. Meltzer, and S. R. Davis, “Sradb: query and use public  
300 next-generation sequencing data from within r,” *BMC bioinformatics*, vol. 14, no. 1,  
301 p. 19, 2013.
- 302 [16] R. Ihaka and R. Gentleman, “R: A language for data analysis and graphics,” *Journal  
303 of Computational and Graphical Statistics*, vol. 5, no. 3, pp. 299–314, 1996.
- 304 [17] W. Huber, V. J. Carey, R. Gentleman, S. Anders, M. Carlson, B. S. Carvalho,  
305 H. C. Bravo, S. Davis, L. Gatto, T. Girke, R. Gottardo, F. Hahne, K. D. Hansen,  
306 R. A. Irizarry, M. Lawrence, M. I. Love, J. MacDonald, V. Obenchain, A. K. Ole’s,  
307 H. Pag’es, A. Reyes, P. Shannon, G. K. Smyth, D. Tenenbaum, L. Waldron, and  
308 M. Morgan, “Orchestrating high-throughput genomic analysis with Bioconductor,”  
309 *Nature Methods*, vol. 12, no. 2, pp. 115–121, 2015.
- 310 [18] R. Leinonen, H. Sugawara, M. Shumway, and on behalf of the International Nu-  
311 cleotide Sequence Database Collaboration, “The sequence read archive,” *Nucleic  
312 Acids Research*, vol. 39, no. supplement1, pp. D19 – D21, 2011.
- 313 [19]
- 314 [20] M. R. Hollingdale and M. Sedegah, “Development of whole sporozoite malaria vac-  
315 cines,” *Expert Review of Vaccines*, vol. 16, no. 1, pp. 45–54, 2017. PMID: 27327875.
- 316 [21] R. A. Seder, L.-J. Chang, M. E. Enama, K. L. Zephir, U. N. Sarwar, I. J. Gor-  
317 don, L. A. Holman, E. R. James, P. F. Billingsley, A. Gunasekera, A. Richman,  
318 S. Chakravarty, A. Manoj, S. Velmurugan, M. Li, A. J. Ruben, T. Li, A. G. Eap-  
319 pen, R. E. Stafford, S. H. Plummer, C. S. Hendel, L. Novik, P. J. M. Costner, F. H.  
320 Mendoza, J. G. Saunders, M. C. Nason, J. H. Richardson, J. Murphy, S. A. David-  
321 son, T. L. Richie, M. Sedegah, A. Sutamihardja, G. A. Fahle, K. E. Lyke, M. B.  
322 Laurens, M. Roederer, K. Tewari, J. E. Epstein, B. K. L. Sim, J. E. Ledgerwood,  
323 B. S. Graham, S. L. Hoffman, and , “Protection against malaria by intravenous

- 324 immunization with a nonreplicating sporozoite vaccine,” *Science*, vol. 341, no. 6152,  
325 pp. 1359–1365, 2013.
- 326 [22] E. M. Bijker, S. Borrmann, S. H. Kappe, B. Mordmüller, B. K. Sack, and S. M.  
327 Khan, “Novel approaches to whole sporozoite vaccination against malaria,” *Vaccine*,  
328 vol. 33, no. 52, pp. 7462 – 7468, 2015. *Malaria Vaccines 2015*.
- 329 [23] G. LaMonte, P. Orjuela-Sanchez, L. Wang, S. Li, J. Swann, A. Cowell, B. Y. Zou,  
330 A. Abdel-Haleem Mohamed, Z. Villa-Galarce, M. Moreno, C. Tong-Rios, J. Vinetz,  
331 N. Lewis, and E. A. Winzeler, “Dual rnaseq shows the human mucosal immunity  
332 protein, muc13, is a hallmark of plasmodium exoerythrocytic infection,” *bioRxiv*,  
333 2017.
- 334 [24] B. Franke-Fayard, J. Fonager, A. Braks, S. M. Khan, and C. J. Janse, “Sequestration  
335 and tissue accumulation of human malaria parasites: Can we learn anything from  
336 rodent models of malaria?,” *PLOS Pathogens*, vol. 6, pp. 1–10, 09 2010.
- 337 [25] P. H. e. a. David, “Parasite sequestration in plasmodium falciparum malaria: spleen  
338 and antibody modulation of cytoadherence of infected erythrocytes,” *Proceedings of  
339 the National Academy of Sciences of the United States of America*, vol. 80, 1983.
- 340 [26] S. M. Lai, J. Sheng, P. Gupta, L. Renia, K. Duan, F. Zolezzi, K. Karjalainen, E. W.  
341 Newell, and C. Ruedl, “Organ-specific fate, recruitment, and refilling dynamics  
342 of tissue-resident macrophages during blood-stage malaria,” *Cell Reports*, vol. 25,  
343 no. 11, pp. 3099 – 3109.e3, 2018.
- 344 [27] “Erp002116.” <https://www.ncbi.nlm.nih.gov/sra/?term=ERP002116>. Accessed:  
345 21-01-2019.
- 346 [28] “Erp004042.” <https://www.ncbi.nlm.nih.gov/sra/?term=ERP004042>. Accessed:  
347 21-01-2019.
- 348 [29] “Srp164768.” <https://www.ncbi.nlm.nih.gov/sra/?term=SRP164768>. Accessed:  
349 21-01-2019.
- 350 [30] L. Gabryšová, M. Alvarez-Martinez, R. Luisier, L. S. Cox, J. Sodenkamp, C. Hosk-  
351 ing, D. Pérez-Mazliah, C. Whicher, Y. Kannan, K. Potempa, X. Wu, L. Bhaw,  
352 H. Wende, M. H. Sieweke, G. Elgar, M. Wilson, J. Briscoe, V. Metzis, J. Langhorne,  
353 N. M. Luscombe, and A. O’Garra, “c-maf controls immune responses by regulating  
354 disease-specific gene networks and repressing il-2 in cd4+ t cells,” vol. 19, 2018.



- 355 [31] M. R. Mamedov, A. Scholzen, R. V. Nair, K. Cumnock, J. A. Kenkel, J. H. M.  
356 Oliveira, D. L. Trujillo, N. Saligrama, Y. Zhang, F. Rubelt, D. S. Schneider, Y. hsiu  
357 Chien, R. W. Sauerwein, and M. M. Davis, “A macrophage colony-stimulating-  
358 factor-producing t cell subset prevents malarial parasitemic recurrence,” *Immunity*,  
359 vol. 48, no. 2, pp. 350 – 363.e7, 2018.
- 360 [32] “Erp005730.” <https://www.ncbi.nlm.nih.gov/sra/?term=ERP005730>. Accessed:  
361 21-01-2019.
- 362 [33] S. Torre, M. J. Polyak, D. Langlais, N. Fodil, J. M. Kennedy, I. Radovanovic,  
363 J. Berghout, G. A. Leiva-Torres, C. M. Krawczyk, S. Ilangumaran, K. Mossman,  
364 C. Liang, K.-P. Knobeloch, L. M. Healy, J. Antel, N. Arbour, A. Prat, J. Majewski,  
365 M. Lathrop, S. M. Vidal, and P. Gros, “Usp15 regulates type i interferon response  
366 and is required for pathogenesis of neuroinflammation,” *Nature Immunology*, vol. 18,  
367 no. 54, 2016.
- 368 [34] “Erp106769.” <https://www.ncbi.nlm.nih.gov/sra/?term=ERP106769>. Accessed:  
369 21-01-2019.
- 370 [35] A. Dobin, C. A. Davis, F. Schlesinger, J. Drenkow, C. Zaleski, S. Jha, P. Batut,  
371 M. Chaisson, and T. R. Gingeras, “Star: ultrafast universal rna-seq aligner,” *Bioin-*  
372 *formatics*, vol. 29, no. 1, pp. 15–21, 2013.
- 373 [36] A. Dobin and T. R. Gingeras, “Mapping rna-seq reads with star,” *Current Protocols*  
374 *in Bioinformatics*, vol. 51, no. 1, pp. 11.14.1–11.14.19.
- 375 [37] M. Lawrence, W. Huber, H. Pagès, P. Aboyoun, M. Carlson, R. Gentleman, M. Mor-  
376 gan, and V. Carey, “Software for computing and annotating genomic ranges,” *PLoS*  
377 *Computational Biology*, vol. 9, 2013.
- 378 [38] “Erp023982.” <https://www.ncbi.nlm.nih.gov/sra/?term=ERP023982>. Accessed:  
379 21-01-2019.
- 380 [39] D. S. Guttery, B. Poulin, A. Ramaprasad, R. J. Wall, D. J. Ferguson, D. Brady,  
381 E.-M. Patzewitz, S. Whipple, U. Straschil, M. H. Wright, A. M. Mohamed, A. Rad-  
382 hakrishnan, S. T. Arold, E. W. Tate, A. A. Holder, B. Wickstead, A. Pain, and  
383 R. Tewari, “Genome-wide functional analysis of plasmodium protein phosphatases  
384 reveals key regulators of parasite development and differentiation,” *Cell Host Mi-*  
385 *crobe*, vol. 16, no. 1, pp. 128 – 140, 2014.

- 386 [40] E. R. Derbyshire, M. Prudêncio, M. M. Mota, and J. Clardy, “Liver-stage malaria  
387 parasites vulnerable to diverse chemical scaffolds,” *Proceedings of the National  
388 Academy of Sciences*, vol. 109, no. 22, pp. 8511–8516, 2012.
- 389 [41] M. D. Robinson, D. J. McCarthy, and G. K. Smyth, “edger: a bioconductor package  
390 for differential expression analysis of digital gene expression data,” *Bioinformatics*,  
391 vol. 26, no. 1, pp. 139–140, 2010.
- 392 [42] McCarthy, D. J., Chen, Yunshun, Smyth, and G. K., “Differential expression analy-  
393 sis of multifactor rna-seq experiments with respect to biological variation,” *Nucleic  
394 Acids Research*, vol. 40, no. 10, pp. 4288–4297, 2012.
- 395 [43] Phipson, S. B, and G, “Permutation p-values should never be zero: Calculating  
396 exact p-values when permutations are randomly drawn,” *Statistical Applications in  
397 Genetics and Molecular Biology*, vol. 9, no. 1, 2010.
- 398 [44] T. A. Knijnenburg, L. F. A. Wessels, M. J. T. Reinders, and I. Shmulevich, “Fewer  
399 permutations, more accurate p-values,” *Bioinformatics*, vol. 25, no. 12, pp. i161–  
400 i168, 2009.
- 401 [45] R. Khanin and E. Wit, *Construction of Malaria Gene Expression Network Using  
402 Partial Correlations*, vol. V, pp. 75–88. 02 2007.
- 403 [46] Y. Zuo, G. Yu, M. G. Tadesse, and H. W. Resson, “Reconstructing biological net-  
404 works using low order partial correlation,” in *2013 IEEE International Conference  
405 on Bioinformatics and Biomedicine*, pp. 171–175, Dec 2013.
- 406 [47] Y. Zuo, G. Yu, M. G. Tadesse, and H. W. Resson, “Biological network inference  
407 using low order partial correlation,” *Methods*, vol. 69, no. 3, pp. 266 – 273, 2014.  
408 Recent development in bioinformatics for utilizing omics data.
- 409 [48] Y. Zuo, G. Yu, M. G. Tadesse, and H. W. Resson, “Biological network inference  
410 using low order partial correlation,” *Methods*, vol. 69, no. 3, pp. 266 – 273, 2014.  
411 Recent development in bioinformatics for utilizing omics data.
- 412 [49] L. L, J. Christian J. Stoeckert, and D. S. Roos *Genome Research*, vol. 13, 2003.
- 413 [50] I. Yanai, D. Graur, and R. Ophir, “Incongruent expression profiles between human  
414 and mouse orthologous genes suggest widespread neutral evolution of transcription  
415 control,” *OMICS: A Journal of Integrative Biology*, vol. 8, no. 1, pp. 15–24, 2004.  
416 PMID: 15107234.

- 417 [51] B.-Y. Liao and J. Zhang, “Evolutionary Conservation of Expression Profiles Between  
418 Human and Mouse Orthologous Genes,” *Molecular Biology and Evolution*, vol. 23,  
419 pp. 530–540, 11 2005.
- 420 [52] P. Tsaparas, L. Mariño-Ramírez, O. Bodenreider, E. V. Koonin, and I. K. Jordan,  
421 “Global similarity and local divergence in human and mouse gene co-expression  
422 networks,” *BMC Evolutionary Biology*, vol. 6, p. 70, Sep 2006.
- 423 [53] W. Guo, C. P. G. Calixto, N. Tzioutziou, P. Lin, R. Waugh, J. W. S. Brown,  
424 and R. Zhang, “Evaluation and improvement of the regulatory inference for large  
425 co-expression networks with limited sample size,” *BMC Systems Biology*, vol. 11,  
426 p. 62, Jun 2017.
- 427 [54] “Erp105548.” <https://www.ncbi.nlm.nih.gov/sra/?term=ERP105548>. Accessed:  
428 21-01-2019.
- 429 [55] “Srp071199.” <https://www.ncbi.nlm.nih.gov/sra/?term=SRP071199>. Accessed:  
430 21-01-2019.
- 431 [56] “Erp107298.” <https://www.ncbi.nlm.nih.gov/sra/?term=ERP107298>. Accessed:  
432 21-01-2019.
- 433 [57] “Srp059851.” <https://www.ncbi.nlm.nih.gov/sra/?term=SRP059851>. Accessed:  
434 21-01-2019.
- 435 [58] “Srp083918.” <https://www.ncbi.nlm.nih.gov/sra/?term=SRP083918>. Accessed:  
436 21-01-2019.
- 437 [59] “Srp143373.” <https://www.ncbi.nlm.nih.gov/sra/?term=SRP143373>. Accessed:  
438 21-01-2019.
- 439 [60] “Erp017542.” <https://www.ncbi.nlm.nih.gov/sra/?term=ERP017542>. Accessed:  
440 21-01-2019.
- 441 [61] “Srp116117.” <https://www.ncbi.nlm.nih.gov/sra/?term=SRP116117>. Accessed:  
442 21-01-2019.
- 443 [62] “Srp116593.” <https://www.ncbi.nlm.nih.gov/sra/?term=SRP116593>. Accessed:  
444 21-01-2019.
- 445 [63] “Srp116793.” <https://www.ncbi.nlm.nih.gov/sra/?term=SRP116793>. Accessed:  
446 21-01-2019.

- 447 [64] “Srp118503.” <https://www.ncbi.nlm.nih.gov/sra/?term=SRP118503>. Accessed:  
448 21-01-2019.
- 449 [65] “Srp118827.” <https://www.ncbi.nlm.nih.gov/sra/?term=SRP118827>. Accessed:  
450 21-01-2019.
- 451 [66] “Srp118996.” <https://www.ncbi.nlm.nih.gov/sra/?term=SRP118996>. Accessed:  
452 21-01-2019.
- 453 [67] “Srp070748.” <https://www.ncbi.nlm.nih.gov/sra/?term=SRP070748>. Accessed:  
454 21-01-2019.
- 455 [68] “Srp109709.” <https://www.ncbi.nlm.nih.gov/sra/?term=SRP109709>. Accessed:  
456 21-01-2019.
- 457 [69] “Erp002273.” <https://www.ncbi.nlm.nih.gov/sra/?term=ERP002273>. Accessed:  
458 21-01-2019.
- 459 [70] “Srp112213.” <https://www.ncbi.nlm.nih.gov/sra/?term=SRP112213>. Accessed:  
460 21-01-2019.
- 461 [71] “Srp164767.” <https://www.ncbi.nlm.nih.gov/sra/?term=SRP164767>. Accessed:  
462 21-01-2019.
- 463 [72] J. Sch’ofer and K. Strimmer, “A shrinkage approach to large-scale covariance matrix  
464 estimation and implications for functional genomics,” *Statistical Applications in*  
465 *Genetics and Molecular Biology*, vol. 4.
- 466 [73] J. Schäfer and K. Strimmer, “An empirical Bayes approach to inferring large-scale  
467 gene association networks,” *Bioinformatics*, vol. 21, pp. 754–764, 10 2004.
- 468 [74] D. Husmeier, A. V. Werhli, and M. Grzegorzczuk, “Comparative evaluation of reverse  
469 engineering gene regulatory networks with relevance networks, graphical gaussian  
470 models and bayesian networks,” *Bioinformatics*, vol. 22, pp. 2523–2531, 07 2006.
- 471 [75] M. Magnani, D. Vega, and M. Dubik, “Analysis and mining of multilayer social  
472 networks,” 2019.
- 473 [76] Z. Hammoud and F. Kramer, “mully: An r package to create, modify and visualize  
474 multilayered graphs,” *Genes*, vol. 9, no. 11, 2018.
- 475 [77] E. Belilovsky, G. Varoquaux, and M. Blaschko, “Testing for differences in gaus-  
476 sian graphical models: Applications to brain connectivity,” in *Proceedings of the*

- 477                    *30th International Conference on Neural Information Processing Systems, NIPS'16,*  
478                    (USA), pp. 595–603, Curran Associates Inc., 2016.
- 479                    [78] B. Wang, R. Singh, and Y. Qi, “A constrained L1 minimization approach for  
480                    estimating multiple sparse gaussian or nonparanormal graphical models,” *CoRR*,  
481                    vol. abs/1605.03468, 2016.
- 482                    [79] W. Liu, “Structural similarity and difference testing on multiple sparse gaussian  
483                    graphical models,” *Ann. Statist.*, vol. 45, pp. 2680–2707, 12 2017.
- 484                    [80] K. Mohan, P. London, M. Fazel, D. M. Witten, and S.-I. Lee, “Node-based learn-  
485                    ing of multiple gaussian graphical models,” *Journal of machine learning research :*  
486                    *JMLR*, vol. 15 1, pp. 445–488, 2014.
- 487                    [81] S. Zhang, H. Zhao, and M. K. Ng, “Functional module analysis for gene coexpression  
488                    networks with network integration,” *IEEE/ACM Transactions on Computational*  
489                    *Biology and Bioinformatics*, vol. 12, pp. 1146–1160, Sep. 2015.
- 490                    [82] M. M. Bourdakou, E. I. Athanasiadis, and G. M. Spyrou, “Discovering gene re-  
491                    ranking efficiency and conserved gene-gene relationships derived from gene co-  
492                    expression network analysis on breast cancer data,” *Scientific Reports*, vol. 6, 2016.
- 493                    [83] Y. R. Wang and H. Huang, “Review on statistical methods for gene network recon-  
494                    struction using expression data,” *Journal of Theoretical Biology*, vol. 362, pp. 53 –  
495                    61, 2014. Network-based biomarkers for complex diseases.
- 496                    [84] R. Opgen-Rhein and K. Strimmer, “From correlation to causation networks: a sim-  
497                    ple approximate learning algorithm and its application to high-dimensional plant  
498                    gene expression data,” *BMC Systems Biology*, vol. 1, p. 37, Aug 2007.
- 499                    [85] C. Frech and N. Chen, “Genome comparison of human and non-human malaria  
500                    parasites reveals species subset-specific genes potentially linked to human disease,”  
501                    *PLOS Computational Biology*, vol. 7, pp. 1–18, 12 2011.
- 502                    [86] K. S., “ppcor: An r package for a fast calculation to semi-partial correlation coeffi-  
503                    cients,” *Commun. Stat. Appl.*, vol. 22, 2015.
- 504                    [87] T. Brugat, A. J. Reid, J.-w. Lin, D. Cunningham, I. Tumwine, G. Kushinga,  
505                    S. McLaughlin, P. Spence, U. Böhme, M. Sanders, S. Conteh, E. Bushell, T. Metcalf,  
506                    O. Billker, P. E. Duffy, C. Newbold, M. Berriman, and J. Langhorne, “Antibody-

- 507 independent mechanisms regulate the establishment of chronic plasmodium infec-  
508 tion,” *Nature Microbiology*, vol. 2, 2017.
- 509 [88] A. Ramaprasad, A. K. Subudhi, R. Culleton, and A. Pain, “A fast and cost-effective  
510 microsampling protocol incorporating reduced animal usage for time-series tran-  
511 scriptomics in rodent malaria parasites,” *bioRxiv*, 2018.
- 512 [89] J. Lawton, T. Brugat, Y. X. Yan, A. J. Reid, U. Böhme, T. D. Otto, A. Pain,  
513 A. Jackson, M. Berriman, D. Cunningham, P. Preiser, and J. Langhorne, “Charac-  
514 terization and gene expression analysis of the cir multi-gene family of plasmodium  
515 chabaudi chabaudi (as),” *BMC Genomics*, vol. 13, p. 125, Mar 2012.
- 516 [90] C. Joyner, A. Moreno, E. V. S. Meyer, M. Cabrera-Mora, The MaHPIC Consor-  
517 tium, A. Kong, C. Ibegbu, D. Arafat, D. Jones, D. P. Nace, E. O. Voit, J. Pohl,  
518 J. Humphrey, J. DeBarry, J. Sullivan, J. B. Gutierrez, K. J. Kevin, L. L. Fon-  
519 seca, M. Styczynski, M. Nural, S. T. Pruett, S. A. Lapp, S. Pakala, T. J. Lamb,  
520 T. Williams, K. Uppal, V. Tran, W. Yin, Y. Yan, J. C. Kissinger, J. W. Barnwell,  
521 and M. R. Galinski, “Plasmodium cynomolgi infections in rhesus macaques display  
522 clinical and parasitological features pertinent to modelling vivax malaria pathology  
523 and relapse infections,” *Malaria Journal*, vol. 15, p. 451, Sep 2016.
- 524 [91] J. E. Quin, I. Bujila, M. Chérif, G. S. Sanou, Y. Qu, M. Vafa Homann, A. Rolicka,  
525 S. B. Sirima, M. A. O’Connell, A. Lennartsson, M. Troye-Blomberg, I. Nebie, and  
526 A.-K. Östlund Farrants, “Major transcriptional changes observed in the fulani, an  
527 ethnic group less susceptible to malaria,” *eLife*, vol. 6, p. e29156, sep 2017.
- 528 [92] K. S. Burrack, M. A. Huggins, E. Taras, P. Dougherty, C. M. Henzler, R. Yang,  
529 S. Alter, E. K. Jeng, H. C. Wong, M. Felices, F. Cichocki, J. S. Miller, G. T.  
530 Hart, A. J. Johnson, S. C. Jameson, and S. E. Hamilton, “Interleukin-15 complex  
531 treatment protects mice from cerebral malaria by inducing interleukin-10-producing  
532 natural killer cells,” *Immunity*, vol. 48, no. 4, pp. 760 – 772.e4, 2018.
- 533 [93] S. A. Ogun, R. Tewari, T. D. Otto, S. A. Howell, E. Knuepfer, D. A. Cunningham,  
534 Z. Xu, A. Pain, and A. A. Holder, “Targeted disruption of py235ebp-1: Invasion of  
535 erythrocytes by plasmodium yoelii using an alternative py235 erythrocyte binding  
536 protein,” *PLOS Pathogens*, vol. 7, pp. 1–14, 02 2011.

- 537 [94] A. Götz, M. S. Tang, M. C. Ty, C. Arama, A. Ongoiba, D. Doumtabe, B. Traore,  
538 P. D. Crompton, P. Loke, and A. Rodriguez, “Atypical activation of dendritic cells by  
539 plasmodium falciparum,” *Proceedings of the National Academy of Sciences*, vol. 114,  
540 no. 49, pp. E10568–E10577, 2017.
- 541 [95] J. Lin, A. Reid, D. Cunningham, U. Böhme, I. Tumwine, S. Keller-Mclaughlin,  
542 M. Sanders, M. Berriman, and J. Langhorne, “Genomic and transcriptomic com-  
543 parisons of closely related malaria parasites differing in virulence and sequestration  
544 pattern [version 1; referees: 2 approved],” *Wellcome Open Research*, vol. 3, no. 142,  
545 2018.
- 546 [96] L. M. Yeoh, C. D. Goodman, V. Mollard, G. I. McFadden, and S. A. Ralph, “Com-  
547 parative transcriptomics of female and male gametocytes in plasmodium berghei  
548 and the evolution of sex in alveolates,” *BMC Genomics*, vol. 18, p. 734, Sep 2017.
- 549 [97] M. C. Rojas-Pena, D. C. Arafat, J. M. Velasquez, S. C. Garimalla, M. Arevalo-  
550 Herrera, S. Herrera, and G. Gibson, “Profiling gene expression of the host response  
551 to a plasmodium vivax irradiated sporozoite immunization and infectious challenge,”  
552 *bioRxiv*, 2018.
- 553 [98] N. Gural, L. Mancio-Silva, A. B. Miller, A. Galstian, V. L. Butty, S. S. Levine, R. Pa-  
554 trapuvich, S. P. Desai, S. A. Mikolajczak, S. H. Kappe, H. E. Fleming, S. March,  
555 J. Sattabongkot, and S. N. Bhatia, “In vitro culture, drug sensitivity, and transcrip-  
556 tome of plasmodium vivax hypnozoites,” *Cell Host Microbe*, vol. 23, no. 3, pp. 395  
557 – 406.e4, 2018.
- 558 [99] I. C. Hirako, P. A. Assis, N. S. Hojo-Souza, G. Reed, H. Nakaya, D. T. Golenbock,  
559 R. S. Coimbra, and R. T. Gazzinelli, “Daily rhythms of tnf expression and food  
560 intake regulate synchrony of plasmodium stages with the host circadian cycle,” *Cell*  
561 *Host Microbe*, vol. 23, no. 6, pp. 796 – 808.e6, 2018.
- 562 [100] A. V. van der Wel, G. Roma, D. K. Gupta, S. Schuierer, F. Nigsch, W. Carbone, A.-  
563 M. Zeeman, B. H. Lee, S. O. Hofman, B. W. Faber, J. Knehr, E. Pasini, B. Kinzel,  
564 P. Bifani, G. M. C. Bonamy, T. Bouwmeester, C. H. M. Kocken, and T. T. Diagana,  
565 “A comparative transcriptomic analysis of replicating and dormant liver stages of  
566 the relapsing malaria parasite plasmodium cynomolgi,” *eLIFE*, vol. 6, 2017.



- 567 [101] A. Kim, J. Popovici, A. Vantaux, R. Samreth, S. Bin, S. Kim, C. Roesch, L. Liang,  
568 H. Davies, P. Felgner, S. Herrera, M. Arévalo-Herrera, D. Ménard, and D. Serre,  
569 “Characterization of *p. vivax* blood stage transcriptomes from field isolates reveals  
570 similarities among infections and complex gene isoforms,” *Scientific Reports*, vol. 7,  
571 2017.
- 572 [102] S. C. Galen, J. Borner, E. S. Martinsen, J. Schaer, C. C. Austin, C. J. West, and S. L.  
573 Perkins, “The polyphyly of *Plasmodium*: comprehensive phylogenetic analyses of  
574 the malaria parasites (order haemosporida) reveal widespread taxonomic conflict,”  
575 *Royal Society Open Science*, vol. 5, no. 5, p. 171780, 2018.
- 576 [103] P. Legendre, “Comparison of permutation methods for the partial correlation and  
577 partial mantel tests,” *Journal of Statistical Computation and Simulation*, vol. 67,  
578 no. 1, pp. 37–73, 2000.
- 579 [104] D. R. Rhodes, S. A. Tomlins, S. Varambally, V. Mahavisno, T. Barrette, S. Kalyana-  
580 Sundaram, D. Ghosh, A. Pandey, and A. M. Chinnaiyan, “Probabilistic model of the  
581 human protein-protein interaction network,” *Nature Biotechnology*, vol. 23, 2005.
- 582 [105] S. Persson, H. Wei, J. Milne, G. P. Page, and C. R. Somerville, “Identification of  
583 genes required for cellulose synthesis by regression analysis of public microarray data  
584 sets,” *Proceedings of the National Academy of Sciences*, vol. 102, no. 24, pp. 8633–  
585 8638, 2005.
- 586 [106] S. Baskerville and D. P. Bartel, “Microarray profiling of micrnas reveals frequent  
587 coexpression with neighboring mirnas and host genes,” *RNA*, vol. 11, 2005.
- 588 [107] S. Torre, M. J. Polyak, D. Langlais, N. Fodil, J. M. Kennedy, I. Radovanovic,  
589 J. Berghout, G. A. Leiva-Torres, C. M. Krawczyk, S. Ilangumaran, K. Mossman,  
590 C. Liang, K.-P. Knobeloch, L. M. Healy, J. Antel, N. Arbour, and Prat, “Usp15  
591 regulates type i interferon response and is required for pathogenesis of neuroinflam-  
592 mation,” *Nature Immunology*, vol. 18, 2016.
- 593 [108] S. Das, N. Hertrich, A. J. Perrin, C. Withers-Martinez, C. R. Collins, M. L. Jones,  
594 J. M. Watermeyer, E. T. Fobes, S. R. Martin, H. R. Saibil, G. J. Wright, M. Treeck,  
595 C. Epp, and M. J. Blackman, “Processing of plasmodium falciparum merozoite  
596 surface protein msp1 activates a spectrin-binding function enabling parasite egress  
597 from rbc,” *Cell Host Microbe*, vol. 18, no. 4, pp. 433 – 444, 2015.



- 598 [109] H. J. Lee, A. Georgiadou, M. Walther, D. Nwakanma, L. B. Stewart, M. Levin, T. D.  
599 Otto, D. J. Conway, L. J. Coin, and A. J. Cunnington, “Integrated pathogen load  
600 and dual transcriptome analysis of systemic host-pathogen interactions in severe  
601 malaria,” *Science Translational Medicine*, vol. 10, no. 447, 2018.
- 602 [110] P. J. Spence, W. Jarra, P. Lévy, A. J. Reid, L. Chappell, T. Brugat, M. Sanders,  
603 M. Berriman, and J. Langhorne, “Vector transmission regulates immune control of  
604 plasmodium virulence,” *Nature*, vol. 498.
- 605 [111] M. L. Rojas-Peña, A. Vallejo, S. Herrera, G. Gibson, and M. Arévalo-Herrera,  
606 “Transcription profiling of malaria-naïve and semi-immune colombian volunteers  
607 in a plasmodium vivax sporozoite challenge,” *PLOS Neglected Tropical Diseases*,  
608 vol. 9, pp. 1–18, 08 2015.
- 609 [112] R. Cubi, S. S. Vembar, A. Biton, J.-F. Franetich, M. Bordessoulles, D. Sos-  
610 sau, G. Zanghi, H. Bosson-Vanga, M. Benard, A. Moreno, N. Dereuddre-Bosquet,  
611 R. Le Grand, A. Scherf, and D. Mazier, “Laser capture microdissection enables tran-  
612 scriptomic analysis of dividing and quiescent liver stages of plasmodium relapsing  
613 species,” *Cellular Microbiology*, vol. 19, no. 8, p. e12735, 2017. e12735 CMI-17-0043.
- 614 [113] K. Modrzynska, C. Pfander, L. Chappell, L. Yu, C. Suarez, K. Dundas, A. R. Gomes,  
615 D. Goulding, J. C. Rayner, J. Choudhary, and O. Billker, “A knockout screen of  
616 *apiap2* genes reveals networks of interacting transcriptional regulators controlling  
617 the plasmodium life cycle,” *Cell Host Microbe*, vol. 21, no. 1, pp. 11 – 22, 2017.
- 618 [114] D. K. Jaijyan, H. Singh, and A. P. Singh, “A sporozoite- and liver stage-expressed  
619 tryptophan-rich protein plays an auxiliary role in plasmodium liver stage develop-  
620 ment and is a potential vaccine candidate,” *Journal of Biological Chemistry*, vol. 290.
- 621 [115] T. M. Tran, M. B. Jones, A. Ongoiba, E. M. Bijker, R. Schats, P. Venepally, J. Skin-  
622 ner, S. Doumbo, E. Quinten, L. G. Visser, E. Whalen, S. Presnell, E. M. O’Connell,  
623 K. Kayentao, D. Chaussabel, H. Lorenzi, T. B. Nutman, T. H. M. Ottenhoff, M. C.  
624 Haks, B. Traore, E. F. Kirkness, R. W. Sauerwein, and P. D. Crompton, “Tran-  
625 scriptomic evidence for modulation of host inflammatory responses during febrile  
626 plasmodium falciparum malaria,” *Scientific Reports*, vol. 6.
- 627 [116] J. Rothen, C. Murie, J. Carnes, A. Anupama, S. Abdulla, M. Chemba, M. Mpina,  
628 M. Tanner, B. K. Lee Sim, S. L. Hoffman, R. Gottardo, C. Daubenberger, and

- 629 K. Stuart, “Whole blood transcriptome changes following controlled human malaria  
630 infection in malaria pre-exposed volunteers correlate with parasite prepatent pe-  
631 riod,” *PLOS ONE*, vol. 13, pp. 1–18, 06 2018.
- [117] J. L. Miller, B. K. Sack, M. Baldwin, A. M. Vaughan, and S. H. Kappe, “Interferon-  
632 mediated innate immune responses against malaria parasite liver stages,” *Cell Re-  
633 ports*, vol. 7, no. 2, pp. 436 – 447, 2014.
- [118] J. Li, B. Cai, Y. Qi, W. Zhao, J. Liu, R. Xu, Q. Pang, Z. Tao, L. Hong, S. Liu,  
634 M. Leerkes, M. Quiñones, and X.-z. Su, “Utr introns, antisense rna and differentially  
635 spliced transcripts between plasmodium yoelii subspecies,” *Malaria Journal*, vol. 15,  
636 p. 30, Jan 2016.
- [119] S. Aibar, C. Fontanillo, C. Droste, and J. De Las Rivas, “Functional gene networks:  
637 R/bioc package to generate and analyse gene networks derived from functional en-  
638 richment and clustering,” *Bioinformatics*, vol. 31, no. 10, pp. 1686–1688, 2015.
- [120] R. Zhang, Z. Ren, and W. Chen, “Silggm: An extensive r package for efficient  
639 statistical inference in large-scale gene networks,” *PLOS Computational Biology*,  
640 vol. 14, pp. 1–14, 08 2018.
- [121] X.-F. Zhang, L. Ou-Yang, S. Yang, X. Hu, and H. Yan, “Diffgraph: an r package  
641 for identifying gene network rewiring using differential graphical models,” *Bioinfor-  
642 matics*, vol. 34, no. 9, pp. 1571–1573, 2018.
- [122] P. S. T. Russo, G. R. Ferreira, L. E. Cardozo, M. C. Bürger, R. Arias-Carrasco,  
643 S. R. Maruyama, T. D. C. Hirata, D. S. Lima, F. M. Passos, K. F. Fukutani,  
644 M. Lever, J. S. Silva, V. Maracaja-Coutinho, and H. I. Nakaya, “Cemitool: a bio-  
645 conductor package for performing comprehensive modular co-expression analyses,”  
646 *BMC Bioinformatics*, vol. 19, p. 56, Feb 2018.
- [123] T. L. Pedersen, “A tidy api for graph manipulation,”
- [124] G. Csardi and T. Nepusz, “The igraph software package for complex network re-  
647 search,” *InterJournal*, vol. Complex Systems, p. 1695, 2006.
- [125] D. Li, S. He, Z. Pan, and G. Hu, “Active modules for multilayer weighted gene  
648 co-expression networks: a continuous optimization approach,” *bioRxiv*, 2016.
- [126] S. Kumari, J. Nie, H.-S. Chen, H. Ma, R. Stewart, X. Li, M.-Z. Lu, W. M. Tay-  
649 lor, and H. Wei, “Evaluation of gene association methods for coexpression network

- 660 construction and biological knowledge discovery,” *PLOS ONE*, vol. 7, pp. 1–17, 11  
661 2012.
- 662 [127] WHO, “World malaria report,” tech. rep., 2018.
- 663 [128] Lee, H. Homin K, S. Amy K, Q. Jon, P. Jie, and Paul, “Coexpression analysis of  
664 human genes across many microarray data sets,” *Genome research*, vol. 14, 2004.
- 665 [129] S. Gandon, M. J. Mackinnon, S. Nee, and A. F. Read, “Imperfect vaccines and the  
666 evolution of pathogen virulence,” *Nature*, vol. 414, 2001.
- 667 [130] F. E. Cox, “History of the discovery of the malaria parasites and their vectors,”  
668 *Parasites Vectors*, vol. 3, p. 5, Feb 2010.
- 669 [131] K. Haldar, S. Bhattacharjee, and I. Safeukui, “Drug resistance in plasmodium,”  
670 *ature Reviews Microbiology*, vol. 16, 2018.
- 671 [132] T. Shay, V. Jojic, O. Zuk, K. Rothamel, D. Puyraimond-Zemmour, T. Feng,  
672 E. Wakamatsu, C. Benoist, D. Koller, and A. Regev, “Conservation and diver-  
673 gence in the transcriptional programs of the human and mouse immune systems,”  
674 *Proceedings of the National Academy of Sciences*, vol. 110, no. 8, pp. 2946–2951,  
675 2013.
- 676 [133] Carlton, S. Jane, H. Joana, and Neil, “The genome of model malaria parasites and  
677 comparative genomics,” *Current Issues in Molecular Biology*, vol. 7, pp. 23–38, 2005.
- 678 [134] A. F. Cowman, D. Berry, and J. Baum, “The cellular and molecular basis for malaria  
679 parasite invasion of the human red blood cell,” *The Journal of Cell Biology*, vol. 198,  
680 no. 6, pp. 961–971, 2012.
- 681 [135] M. Lawrence, W. Huber, H. Pagès, P. Aboyoun, M. Carlson, R. Gentleman, M. T.  
682 Morgan, and V. J. Carey, “Software for computing and annotating genomic ranges,”  
683 *PLOS Computational Biology*, vol. 9, pp. 1–10, 08 2013.
- 684 [136] E. L. Flannery, A. K. Chatterjee, and E. A. Winzeler, “Antimalarial drug discovery  
685 — approaches and progress towards new medicines,” *Nature Reviews Microbiology*,  
686 vol. 11, 2013.
- 687 [137] A. Conesa, P. Madrigal, S. Tarazona, D. Gomez-Cabrero, A. Cervera, A. McPherson,  
688 M. W. Szczesniak, D. J. Gaffney, L. L. Elo, X. Zhang, and A. Mortazavi, “A survey  
689 of best practices for rna-seq data analysis,” *Genome Biology*, vol. 17, p. 13, Jan  
690 2016.

- 691 [138] N. Hall, M. Karras, J. D. Raine, J. M. Carlton, T. W. A. Kooij, M. Berriman,  
692 L. Florens, C. S. Janssen, A. Pain, G. K. Christophides, K. James, K. Rutherford,  
693 B. Harris, D. Harris, C. Churcher, M. A. Quail, D. Ormond, J. Doggett, H. E. True-  
694 man, J. Mendoza, S. L. Bidwell, M.-A. Rajandream, D. J. Carucci, J. R. Yates, F. C.  
695 Kafatos, C. J. Janse, B. Barrell, C. M. R. Turner, A. P. Waters, and R. E. Sinden,  
696 “A comprehensive survey of the plasmodium life cycle by genomic, transcriptomic,  
697 and proteomic analyses,” *Science*, vol. 307, no. 5706, pp. 82–86, 2005.
- 698 [139] M. Rug, S. W. Prescott, K. M. Fernandez, B. M. Cooke, and A. F. Cowman, “The  
699 role of kahrp domains in knob formation and cytoadherence of p falciparum-infected  
700 human erythrocytes,” *Blood*, vol. 108, no. 1, pp. 370–378, 2006.
- 701 [140] E. Bushell, A. R. Gomes, T. Sanderson, B. Anar, G. Girling, C. Herd, T. Met-  
702 calf, K. Modrzynska, F. Schwach, R. E. Martin, M. W. Mather, G. I. McFadden,  
703 L. Parts, G. G. Rutledge, A. B. Vaidya, K. Wengelnik, J. C. Rayner, and O. Billker,  
704 “Functional profiling of a plasmodium genome reveals an abundance of essential  
705 genes,” *Cell*, vol. 170, no. 2, pp. 260 – 272.e8, 2017.
- 706 [141] A. K. Dasanna, C. Lansche, M. Lanzer, and U. S. Schwarz, “Rolling adhesion of  
707 schizont stage malaria-infected red blood cells in shear flow,” *Biophysical Journal*,  
708 vol. 112, no. 9, pp. 1908 – 1919, 2017.
- 709 [142] M. Recker, C. O. Buckee, A. Serazin, S. Kyes, R. Pinches, Z. Christodoulou, A. L.  
710 Springer, S. Gupta, and C. I. Newbold, “Antigenic variation in plasmodium faldi-  
711 parum malaria involves a highly structured switching pattern,” *PLOS Pathogens*,  
712 vol. 7, pp. 1–11, 03 2011.
- 713 [143] K. W. Deitsch and R. Dzikowski, “Variant gene expression and antigenic variation  
714 by malaria parasites,” *Annual Review of Microbiology*, vol. 71, no. 1, pp. 625–641,  
715 2017. PMID: 28697665.
- 716 [144] A. S. Aly, A. M. Vaughan, and S. H. Kappe, “Malaria parasite development in the  
717 mosquito and infection of the mammalian host,” *Annual Review of Microbiology*,  
718 vol. 63, no. 1, pp. 195–221, 2009. PMID: 19575563.
- 719 [145] E. Nourani, F. Khunjush, and S. Durmuş, “Computational approaches for prediction  
720 of pathogen-host protein-protein interactions,” *Frontiers in Microbiology*, vol. 6,  
721 p. 94, 2015.

- 722 [146] P. F. L. Reyes, T. Michoel, A. Joshi, and G. Devailly, “Meta-analysis of liver  
723 and heart transcriptomic data for functional annotation transfer in mammalian  
724 orthologs,” *bioRxiv*, 2017.
- 725 [147] S. Tornow and H. W. Mewes, “Functional modules by relating protein interaction  
726 networks and gene expression,” *Nucleic Acids Research*, vol. 31, no. 21, pp. 6283–  
727 6289, 2003.
- 728 [148] Y.-C. Wang, C. Lin, M.-T. Chuang, W.-P. Hsieh, C.-Y. Lan, Y.-J. Chuang, and  
729 B.-S. Chen, “Interspecies protein-protein interaction network construction for char-  
730 acterization of host-pathogen interactions: a candida albicans-zebrafish interaction  
731 study,” *BMC Systems Biology*, vol. 7, p. 79, Aug 2013.
- 732 [149] H. M. Abkallo, A. Martinelli, M. Inoue, A. Ramaprasad, P. Xangsayarath, J. Gitaka,  
733 J. Tang, K. Yahata, A. Zoungrana, H. Mitaka, A. Acharjee, P. P. Datta, P. Hunt,  
734 R. Carter, O. Kaneko, V. Mustonen, C. J. R. Illingworth, A. Pain, and R. Cul-  
735 leton, “Rapid identification of genes controlling virulence and immunity in malaria  
736 parasites,” *PLOS Pathogens*, vol. 13, pp. 1–24, 07 2017.
- 737 [150] S. van Dam, U. Vösa, A. van der Graaf, L. Franke, and J. P. de Magalhães, “Gene  
738 co-expression analysis for functional classification and gene–disease predictions,”  
739 *Briefings in Bioinformatics*, p. bbw139, 2017.
- 740 [151] S. Wuchty, J. H. Adams, and M. T. Ferdig, “A comprehensive plasmodium faldi-  
741 parum protein interaction map reveals a distinct architecture of a core interactome,”  
742 *PROTEOMICS*, vol. 9, no. 7, pp. 1841–1849, 2009.
- 743 [152] M. Tomasini, “An introduction to multilayer networks,” 2015.
- 744 [153] Langfelder, H. Peter, and Steve, “Fast r functions for robust correlations and hier-  
745 archical clustering,” *Journal of Statistical Software*, vol. 46, no. 11, 2012.
- 746 [154] Pearson and Karl, “Mathematical contributions to the theory of evolution. on a form  
747 of spurious correlation which may arise when indices are used in the measurement  
748 of organs,” *Proceedings of the Royal Society of London*, vol. 60, pp. 489–498, 1897.
- 749 [155] S. Boccaletti, G. Bianconi, R. Criado, C. del Genio, J. Gómez-Gardeñes, M. Ro-  
750 mance, I. Sendiña-Nadal, Z. Wang, and M. Zanin, “The structure and dynamics  
751 of multilayer networks,” *Physics Reports*, vol. 544, no. 1, pp. 1 – 122, 2014. The  
752 structure and dynamics of multilayer networks.

- 753 [156] F. Battiston, V. Nicosia, and V. Latora, “Structural measures for multiplex net-  
754 works,” *Phys. Rev. E*, vol. 89, p. 032804, Mar 2014.
- 755 [157] A. Aleta and Y. Moreno, “Multilayer networks in a nutshell,” *Annual Review of*  
756 *Condensed Matter Physics*, vol. 10, no. 1, p. null, 2019.
- 757 [158] M. I. Love, W. Huber, and S. Anders, “Moderated estimation of fold change and  
758 dispersion for rna-seq data with deseq2,” *Genome Biology*, vol. 15, p. 550, 2014.
- 759 [159] M. De Domenico, A. Solé-Ribalta, E. Cozzo, M. Kivelä, Y. Moreno, M. A. Porter,  
760 S. Gómez, and A. Arenas, “Mathematical formulation of multilayer networks,” *Phys.*  
761 *Rev. X*, vol. 3, p. 041022, Dec 2013.
- 762 [160] W. Liu, T. Suzumura, H. Ji, and G. Hu, “Finding overlapping communities in  
763 multilayer networks,” *PLOS ONE*, vol. 13, pp. 1–22, 04 2018.
- 764 [161] Y. Zhao, E. Levina, and J. Zhu, “Community extraction for social networks,” *Pro-*  
765 *ceedings of the National Academy of Sciences*, vol. 108, no. 18, pp. 7321–7326, 2011.
- 766 [162] B. Zhang and S. Horvath, “A general framework for weighted gene co-expression  
767 network analysis,” *Statistical Applications in Genetics and Molecular Biology*, vol. 4,  
768 no. 1, 2005.
- 769 [163] Barabási, O. Albert-László, and Z. N., “Network biology: understanding the cell’s  
770 functional organization,” *Nature Reviews Genetics*, vol. 5, 2004.
- 771 [164] A. Reverter and E. K. F. Chan, “Combining partial correlation and an informa-  
772 tion theory approach to the reversed engineering of gene co-expression networks,”  
773 *Bioinformatics*, vol. 24, no. 21, pp. 2491–2497, 2008.
- 774 [165] O. D. Iancu, S. Kawane, D. Bottomly, R. Searles, R. Hitzemann, and S. McWeeney,  
775 “Utilizing rna-seq data for de novo coexpression network inference,” *Bioinformatics*,  
776 vol. 28, no. 12, pp. 1592–1597, 2012.
- 777 [166] Segal, S. Eran, R. Michael, P. Aviv, B. Dana, K. David, F. Daphne, and Nir, “Mod-  
778 ule networks: identifying regulatory modules and their condition-specific regulators  
779 from gene expression data,” *Nature Genetics*, vol. 34, 2003.
- 780 [167] S. Wuchty, “Computational prediction of host-parasite protein interactions between  
781 p. falciparum and h. sapiens,” *PLOS ONE*, vol. 6, pp. 1–8, 11 2011.
- 782 [168] J. Friedman and E. J. Alm, “Inferring correlation networks from genomic survey  
783 data,” *PLOS Computational Biology*, vol. 8, pp. 1–11, 09 2012.

- 784 [169] Z. D. Kurtz, C. L. Müller, E. R. Miraldi, D. R. Littman, M. J. Blaser, and R. A.  
785 Bonneau, “Sparse and compositionally robust inference of microbial ecological net-  
786 works,” *PLOS Computational Biology*, vol. 11, pp. 1–25, 05 2015.
- 787 [170] Yamagishi, N. Junya, T. Anna, M. Mohammed E.M., S. Arthur E., K. Chihiro,  
788 K. Toshiaki, M. Shuichi, M. Wojciech, E. Ryuichiro, T. Yuki, Josef, Suzuki, and  
789 Yutaka, “Interactive transcriptome analysis of malaria patients and infecting plas-  
790 modium falciparum,” *Genome Research*, vol. 24, pp. 1433–1444, 2014.
- 791 [171] B. M. Musungu, D. Bhatnagar, R. L. Brown, G. A. Payne, G. OBrian, A. M.  
792 Fakhoury, and M. Geisler, “A network approach of gene co-expression in the zea  
793 mays/aspergillus flavus pathosystem to map host/pathogen interaction pathways,”  
794 *Frontiers in Genetics*, vol. 7, p. 206, 2016.
- 795 [172] C. W. Remmele, C. H. Luther, J. Balkenhol, T. Dandekar, T. Müller, and M. T.  
796 Dittrich, “Integrated inference and evaluation of host–fungi interaction networks,”  
797 *Frontiers in Microbiology*, vol. 6, p. 764, 2015.
- 798 [173] S. Durmuş, T. Çakır, A. Özgür, and R. Guthke, “A review on computational systems  
799 biology of pathogen–host interactions,” *Frontiers in Microbiology*, vol. 6, p. 235,  
800 2015.
- 801 [174] L. Song, P. Langfelder, and S. Horvath, “Comparison of co-expression measures:  
802 mutual information, correlation, and model based indices,” *BMC Bioinformatics*,  
803 vol. 13, p. 328, Dec 2012.
- 804 [175] A. K. Subudhi, P. A. Boopathi, I. Pandey, R. Kaur, S. Middha, J. Acharya, S. K.  
805 Kochar, D. K. Kochar, and A. Das, “Disease specific modules and hub genes for  
806 intervention strategies: A co-expression network based approach for plasmodium  
807 falciparum clinical isolates,” *Infection, Genetics and Evolution*, vol. 35, pp. 96 –  
808 108, 2015.
- 809 [176] M. L. Smith and M. P. Styczynski, “Systems biology-based investigation of  
810 host–plasmodium interactions,” *Trends in Parasitology*, vol. 34, no. 7, pp. 617 –  
811 632, 2018.
- 812 [177] A. Grönlund, R. P. Bhalerao, and J. Karlsson, “Modular gene expression in poplar:  
813 A multilayer network approach,” *The New Phytologist*, vol. 181, no. 2, pp. 315–322,  
814 2009.



- 815 [178] L. Cantini, E. Medico, S. Fortunato, and M. Caselle, “Detection of gene communities  
816 in multi-networks reveals cancer drivers,” *Scientific Reports*, vol. 5, 2015.
- 817 [179] D. Li, Z. Zhu, Z. Pan, G. Hu, and S. He, “Extracting active modules from multilayer  
818 ppi network: a continuous optimization approach,” *bioRxiv*, 2017.
- 819 [180] G. Palla, I. Derényi, I. Farkas, and T. Vicsek, “Uncovering the overlapping commu-  
820 nity structure of complex networks in nature and society,” *Nature*, vol. 435, 2005.
- 821 [181] X. Li, M. Wu, C.-K. Kwoh, and S.-K. Ng, “Computational approaches for detecting  
822 protein complexes from protein interaction networks: a survey,” *BMC Genomics*,  
823 vol. 11, p. S3, Feb 2010.
- 824 [182] M. Zitnik and J. Leskovec, “Predicting multicellular function through multi-layer  
825 tissue networks,” *Bioinformatics*, vol. 33, no. 14, pp. i190–i198, 2017.
- 826 [183] D. Beisser, G. W. Klau, T. Dandekar, T. Müller, and M. T. Dittrich, “Bionet: an  
827 r-package for the functional analysis of biological networks,” *Bioinformatics*, vol. 26,  
828 no. 8, pp. 1129–1130, 2010.
- 829 [184] P. Parsana, C. Ruberman, A. E. Jaffe, M. C. Schatz, A. Battle, and J. T. Leek,  
830 “Addressing confounding artifacts in reconstruction of gene co-expression networks,”  
831 *bioRxiv*, 2018.
- 832 [185] S. Freytag, J. Gagnon-Bartsch, T. P. Speed, and M. Bahlo, “Systematic noise  
833 degrades gene co-expression signals but can be corrected,” *BMC Bioinformatics*,  
834 vol. 16, p. 309, Sep 2015.
- 835 [186] J. Friedman and E. J. Alm, “Inferring correlation networks from genomic survey  
836 data,” *PLOS Computational Biology*, vol. 8, pp. 1–11, 09 2012.
- 837 [187] Z. D. Kurtz, C. L. Müller, E. R. Miraldi, D. R. Littman, M. J. Blaser, and R. A.  
838 Bonneau, “Sparse and compositionally robust inference of microbial ecological net-  
839 works,” *PLOS Computational Biology*, vol. 11, pp. 1–25, 05 2015.
- 840 [188] Y. Deng, Y.-H. Jiang, Y. Yang, Z. He, F. Luo, and J. Zhou, “Molecular ecological  
841 network analyses,” *BMC Bioinformatics*, vol. 13, p. 113, May 2012.
- 842 [189] N. A. Fonseca, J. Rung, A. Brazma, and J. C. Marioni, “Tools for mapping high-  
843 throughput sequencing data,” *Bioinformatics*, vol. 28, no. 24, pp. 3169–3177, 2012.
- 844 [190] H. Li and R. Durbin, “Fast and accurate short read alignment with burrows–wheeler  
845 transform,” *Bioinformatics*, vol. 25, no. 14, pp. 1754–1760, 2009.



- 846 [191] T. W. Lam, W. K. Sung, S. L. Tam, C. K. Wong, and S. M. Yiu, “Compressed  
847 indexing and local alignment of dna,” *Bioinformatics*, vol. 24, no. 6, pp. 791–797,  
848 2008.
- 849 [192] H. Yang and G. Churchill, “Estimating p-values in small microarray experiments,”  
850 *Bioinformatics*, vol. 23, no. 1, pp. 38–43, 2007.
- 851 [193] J. Li, D. Witten, I. Johnstone, and R. Tibshirani, “Normalization, testing, and false  
852 discovery rate estimation for rna-sequencing data,” *Biostatistics*, vol. 13, pp. 523–  
853 538, 7 2012.
- 854 [194] C. J. Wolfe, I. S. Kohane, and A. J. Butte, “Systematic survey reveals general  
855 applicability of “guilt-by-association” within gene coexpression networks,” *BMC*  
856 *Bioinformatics*, vol. 6, p. 227, Sep 2005.
- 857 [195] H. J. Lee, A. Georgiadou, T. D. Otto, M. Levin, L. J. Coin, D. J. Conway, and A. J.  
858 Cunnington, “Transcriptomic studies of malaria: a paradigm for investigation of  
859 systemic host-pathogen interactions,” *Microbiology and Molecular Biology Reviews*,  
860 vol. 82, no. 2, 2018.
- 861 [196] O. Silvie, M. M. Mota, K. Matuschewski, and M. Prudêncio, “Interactions of the  
862 malaria parasite and its mammalian host,” *Current Opinion in Microbiology*, vol. 11,  
863 no. 4, pp. 352 – 359, 2008. Host–microbe interactions: fungi/parasites/viruses.
- 864 [197] G. V. Glass, “Primary, secondary, and meta-analysis of research,” *Educational Re-*  
865 *searcher*, vol. 5, no. 10, pp. 3–8, 1976.
